# Supplementary material for: Clinical Samples with Delayed Processing Time are Associated with Lower HIV Viral Load Results in a High-Volume Regional Laboratory, Njombe Region, Tanzania (Oct 2024–Mar 2025)
Source: Research Square preprint supplement (doi:10.21203/rs.3.rs-8647781/v1), 2026-01-29
Supplement: Supplementary file 1 [file 111aa97cde6a6c31316d0b3b.docx]

Supplementary Table 1. Baseline characteristics by HIV viral load category (N = 18,025)

| **Characteristic** | **Total N (%)** | **TND (n=13,157)** | **<40 (n=2,323)** | **40–199 (n=1,555)** | **200–999 (n=388)** | **≥1000 (n=602)** | **p-value†** |
| --- | --- | --- | --- | --- | --- | --- | --- |
| **Sex** |  |  |  |  |  |  | <0.001 |
| Female | 12,933 (71.8) | 9,661 (73.4) | 1,548 (66.6) | 1,049 (67.5) | 258 (66.5) | 417 (69.3) |  |
| Male | 5,092 (28.2) | 3,496 (26.6) | 775 (33.4) | 506 (32.5) | 130 (33.5) | 185 (30.7) |  |
| **Age Group** |  |  |  |  |  |  | <0.001 |
| 0–9 y | 174 (1.0) | 107 (0.8) | 18 (0.8) | 28 (1.8) | 8 (2.1) | 13 (2.2) |  |
| 10–19 y | 730 (4.1) | 440 (3.3) | 90 (3.9) | 84 (5.4) | 39 (10.1) | 77 (12.8) |  |
| 20–49 y | 12,358 (68.6) | 9,037 (68.7) | 1,598 (68.8) | 1,059 (68.1) | 257 (66.2) | 407 (67.6) |  |
| ≥50 y | 4,763 (26.4) | 3,573 (27.2) | 617 (26.6) | 384 (24.7) | 84 (21.6) | 105 (17.4) |  |
| **ART Regimen** |  |  |  |  |  |  | <0.001 |
| 1r-A | 4,369 (39.5) | 3,253 (40.8) | 464 (34.3) | 411 (37.9) | 97 (36.7) | 144 (38.1) |  |
| 1x-A | 6,178 (55.9) | 4,353 (54.6) | 830 (61.3) | 629 (58.0) | 153 (58.0) | 213 (56.3) |  |
| 1x-P | 421 (3.8) | 306 (3.8) | 47 (3.5) | 40 (3.7) | 9 (3.4) | 19 (5.0) |  |
| Other* | 82 (0.7) | 58 (0.4) | 16 (0.7) | 5 (0.3) | 8 (0.4) | 3 (0.5) |  |
| **Adherence** |  |  |  |  |  |  | <0.001 |
| Good | 4,344 (39.3) | 3,236 (40.6) | 464 (34.3) | 406 (37.4) | 95 (36.0) | 143 (37.8) |  |
| Fair | 6,706 (60.7) | 4,734 (59.4) | 889 (65.7) | 679 (62.6) | 169 (64.0) | 235 (62.2) |  |
| **Collection → Reception TAT** |  |  |  |  |  |  | 0.001 |
| Q1 ≤1 day | 8,191 (45.5) | 6,006 (45.7) | 965 (41.5) | 743 (47.8) | 197 (50.8) | 280 (46.5) |  |
| Q2 = 2 days | 2,396 (13.3) | 1,770 (13.5) | 302 (13.0) | 208 (13.4) | 43 (11.1) | 73 (12.1) |  |
| Q3 = 3–4 days | 4,674 (25.9) | 3,377 (25.7) | 669 (28.8) | 398 (25.6) | 84 (21.6) | 146 (24.3) |  |
| Q4 ≥5 days | 2,764 (15.3) | 2,004 (15.2) | 387 (16.7) | 206 (13.2) | 64 (16.5) | 103 (17.1) |  |
| **Reception → Registration TAT** |  |  |  |  |  |  | <0.001 |
| Q1 (Fastest) | 6,699 (37.2) | 4,784 (36.4) | 932 (40.1) | 564 (36.3) | 188 (48.5) | 231 (38.4) |  |
| Q2 | 4,027 (22.3) | 2,907 (22.1) | 531 (22.9) | 368 (23.7) | 88 (22.7) | 133 (22.1) |  |
| Q3 | 4,127 (22.9) | 3,029 (23.0) | 526 (22.6) | 367 (23.6) | 70 (18.0) | 135 (22.4) |  |
| Q4 ≥7 days | 3,172 (17.6) | 2,437 (18.5) | 334 (14.4) | 256 (16.5) | 42 (10.8) | 103 (17.1) |  |
| **Registration → Testing TAT** |  |  |  |  |  |  | <0.001 |
| Q1 ≤1 day | 6,907 (38.3) | 4,681 (35.6) | 1,021 (43.9) | 723 (46.5) | 223 (57.5) | 259 (43.0) |  |
| Q2 2–3 days | 2,174 (12.1) | 1,457 (11.1) | 390 (16.8) | 215 (13.8) | 42 (10.8) | 70 (11.6) |  |
| Q3 4–20 days | 4,540 (25.2) | 3,225 (24.5) | 761 (32.8) | 314 (20.2) | 66 (17.0) | 174 (28.9) |  |
| Q4 ≥21 days | 4,404 (24.4) | 3,794 (28.8) | 151 (6.5) | 303 (19.5) | 57 (14.7) | 99 (16.4) |  |

*Other includes 2x-A, 3x-A, 1b-P

†p-values from Pearson chi-square tests

Supplementary Table 2. Adjusted predictors of HIV viral load categories (N = 18,025)

Base Outcome: Target Not Detected (TND)

Adjusted Model: Multiply imputed (20 imputations), after imputation (N = 157,443)

Bolded RRRs indicate statistically significant associations (p < 0.05).

| **Collection → Reception TAT (Ref: Q1)** | | | | |
| --- | --- | --- | --- | --- |
| **Quartile** | **<40 (Adjusted)** | **40–199 (Adjusted)** | **200–999 (Adjusted)** | **>1000 (Adjusted)** |
| Q2 | 0.898 (0.855–0.943); **p<0.001** | 0.931 (0.875–0.989); **p<0.05** | 0.776 (0.691–0.870); **p<0.001** | 1.020 (0.933–1.116) |
| Q3 | 1.015 (0.976–1.055) | 0.831 (0.789–0.875); **p<0.001** | 0.472 (0.424–0.525); **p<0.001** | 0.796 (0.737–0.860); **p<0.001** |
| Q4 (Slowest) | 1.193 (1.142–1.245); **p<0.001** | 0.790 (0.745–0.838); **p<0.001** | 0.733 (0.661–0.812); **p<0.001** | 0.988 (0.909–1.073) |
| **Reception → Registration TAT (Ref: Q1)** | | | | |
| **Quartile** | **<40 (Adjusted)** | **40–199 (Adjusted)** | **200–999 (Adjusted)** | **>1000 (Adjusted)** |
| Q2 | 1.031 (0.993–1.070) | 1.182 (1.126–1.240); **p<0.001** | 0.940 (0.860–1.030) | 0.929 (0.865–0.999); p<0.05 |
| Q3 | 0.952 (0.906–1.000); p<0.10 | 1.156 (1.088–1.228); **p<0.001** | 0.450 (0.378–0.520); **p<0.001** | 0.974 (0.888–1.069) |
| Q4 (Slowest) | 1.003 (0.908–1.107) | 0.960 (0.847–1.088) | 0.391 (0.286–0.535); **p<0.001** | 0.841 (0.695–1.015); p<0.10 |
| **Registration → Testing TAT (Ref: Q1)** | | | | |
| **Quartile** | **<40 (Adjusted)** | **40–199 (Adjusted)** | **200–999 (Adjusted)** | **>1000 (Adjusted)** |
| Q2 | 1.527 (1.463–1.595); **p<0.001** | 1.157 (1.090–1.228); **p<0.001** | 0.766 (0.684–0.856); **p<0.001** | 1.411 (1.297–1.536); **p<0.001** |
| Q3 | 1.195 (1.150–1.242); **p<0.001** | 0.841 (0.797–0.887); **p<0.001** | 0.418 (0.378–0.463); **p<0.001** | 0.984 (0.911–1.062) |
| Q4 (Slowest) | 0.288 (0.273–0.303); **p<0.001** | 0.597 (0.564–0.634); **p<0.001** | 0.388 (0.349–0.431); **p<0.001** | 0.476 (0.435–0.520); **p<0.001** |
| **Sex (Ref: Female)** | | | | |
| **Sex** | **<40 (Adjusted)** | **40–199 (Adjusted)** | **200–999 (Adjusted)** | **>1000 (Adjusted)** |
| Male | 1.405 (1.362–1.449); **p<0.001** | 1.275 (1.222–1.330); **p<0.001** | 1.856 (1.719–2.003); **p<0.001** | 1.251 (1.178–1.329); **p<0.001** |
| **Age Group (Ref: 0–9 years)** | | | | |
| **Age Group** | **<40 (Adjusted)** | **40–199 (Adjusted)** | **200–999 (Adjusted)** | **>1000 (Adjusted)** |
| 10–19 | 1.299 (1.096–1.538); **p<0.01** | 0.870 (0.734–1.031) | 1.823 (1.335–2.490); **p<0.001** | 1.317 (1.079–1.607); **p<0.01** |
| 20–49 | 1.152 (0.988–1.343); **p<0.10** | 0.520 (0.448–0.605); **p<0.001** | 0.547 (0.407–0.734); **p<0.001** | 0.372 (0.309–0.447); **p<0.001** |
| 50+ | 1.278 (1.095–1.492); **p<0.01** | 0.539 (0.463–0.628); **p<0.001** | 0.545 (0.404–0.736); **p<0.001** | 0.289 (0.239–0.350); **p<0.001** |
| **ART Regimen (Ref: 1r-A)** | | | | |
| **ART Regimen** | **<40 (Adjusted)** | **40–199 (Adjusted)** | **200–999 (Adjusted)** | **>1000 (Adjusted)** |
| 1x-A | 0.939 (0.758–1.164) | 0.665 (0.508–0.870); **p<0.001** | 0.570 (0.347–0.937); **p<0.05** | 0.635 (0.403–1.000); **p<0.05** |
| 1x-P | 1.058 (0.852–1.313) | 0.776 (0.588–1.025); p<0.10 | 0.779 (0.470–1.293) | 0.865 (0.544–1.376) |
| **ART Adherence (Ref: Fair)** | | | | |
| **ART Adherence** | **<40 (Adjusted)** | **40–199 (Adjusted)** | **200–999 (Adjusted)** | **>1000 (Adjusted)** |
| Good | 0.95 (0.77–1.19) | 0.92 (0.69–1.22) | 0.86 (0.52–1.44) | 0.90 (0.56–1.46) |
|  |  |  |  |  |

Supplementary Table 3: Complete-Case Adjusted Model for Sensitivity Analysis (N = 11,050)

Base Outcome: Target Not Detected (TND)

Adjusted Model: Multinomial logistic regression (complete cases only) RRR = Relative Risk Ratio; TND = Target Not Detected.

Bolded RRRs indicate statistically significant associations (p < 0.05).

| **Collection → Reception TAT (Ref: Q1/Q2)** | | | | |
| --- | --- | --- | --- | --- |
|
| **Quartile** | **<40 (95% CI); p** | **40–199 (95% CI); p** | **200–999 (95% CI); p** | **>1000 (95% CI); p** |
| Q3 | 1.25 (1.08–1.44); **p=0.003** | 1.05 (0.89–1.24) | 0.80 (0.57–1.13) | 0.80 (0.61–1.06) |
| Q4 (Slowest) | 1.06 (0.90–1.24) | 1.03 (0.87–1.22) | 1.09 (0.79–1.50) | 1.00 (0.76–1.31) |
| **Reception → Registration TAT (Ref: Q1)** | | | | |
|
| **Quartile** | <40 (95% CI); p | 40–199 (95% CI); p | 200–999 (95% CI); p | >1000 (95% CI); p |
| Q2 | 1.07 (0.89–1.28) | 0.78 (0.64–0.95); **p=0.013** | 0.52 (0.37–0.74); **p<0.001** | 0.91 (0.66–1.27) |
| Q3 | 0.97 (0.81–1.15) | 0.70 (0.58–0.84); **p<0.001** | 0.45 (0.32–0.63); **p<0.001** | 0.92 (0.68–1.26) |
| Q4 (Slowest) | 0.96 (0.79–1.16) | 0.69 (0.56–0.84); **p<0.001** | 0.39 (0.26–0.58); **p<0.001** | 0.92 (0.66–1.29) |
| **Registration → Testing TAT (Ref: Q1)** | | | | |
|
| **Quartile** | **<40 (95% CI); p** | **40–199 (95% CI); p** | **200–999 (95% CI); p** | **>1000 (95% CI); p** |
| Q2 | 1.00 (0.82–1.22) | 1.09 (0.87–1.35) | 0.71 (0.44–1.16) | 0.49 (0.30–0.80); **p=0.004** |
| Q3 | 1.10 (0.93–1.30) | 0.64 (0.52–0.79); p<0.001 | 0.58 (0.38–0.87); p=0.009 | 1.07 (0.79–1.44) |
| Q4 (Slowest) | 0.10 (0.07–0.14); **p<0.001** | 0.55 (0.45–0.66); **p<0.001** | 0.30 (0.19–0.46); **p<0.001** | 0.42 (0.30–0.59); **p<0.001** |
| **Age Group (Ref: 0–9 years)** | | | | |
|
| **Age** | **<40 (95% CI); p** | **40–199 (95% CI); p** | **200–999 (95% CI); p** | **>1000 (95% CI); p** |
| 10–19 years | 1.22 (0.55–2.68) | 0.64 (0.35–1.17) | 0.92 (0.35–2.40) | 1.56 (0.66–3.66) |
| 20–49 years | 0.98 (0.48–2.04) | 0.37 (0.21–0.63); p<0.001 | 0.25 (0.11–0.61); p=0.002 | 0.34 (0.15–0.77); p=0.009 |
| 50+ years | 0.82 (0.39–1.71) | 0.30 (0.18–0.53); **p<0.001** | 0.19 (0.08–0.46); **p<0.001** | 0.19 (0.08–0.44); **p<0.001** |
| **Sex (Ref: Female)** | | | | |
|
| **Sex** | **<40 (95% CI); p** | **40–199 (95% CI); p** | **200–999 (95% CI); p** | **>1000 (95% CI); p** |
| Male | 1.33 (1.16–1.52); **p<0.001** | 1.42 (1.23–1.64); **p<0.001** | 1.17 (0.88–1.56) | 1.23 (0.97–1.57); **p=0.088** |
| **ART Regimen (Ref: 1r-A)** | | | | |
| **ART Regimen** | **<40 (95% CI); p** | **40–199 (95% CI); p** | **200–999 (95% CI); p** | **>1000 (95% CI); p** |
| 1x-A | 0.69 (0.45–1.04); **p=0.074** | 0.78 (0.51–1.19) | 0.62 (0.28–1.33) | 0.75 (0.37–1.52) |
| 1x-P | 0.88 (0.52–1.48) | 0.91 (0.53–1.55) | 0.74 (0.27–2.02) | 0.99 (0.43–2.30) |
| **ART Adherence (Ref: Fair)** | | | | |
|
| **ART Adherence** | **<40 (95% CI); p** | **40–199 (95% CI); p** | **200–999 (95% CI); p** | **>1000 (95% CI); p** |
| Good | 0.63 (0.42–0.96); **p=0.031** | 0.93 (0.61–1.42) | 0.76 (0.35–1.65) | 0.74 (0.36–1.52) |
